# Supplementary material for: A photoluminescent microporous metal organic anionic framework for nitroaromatic explosive sensing
Source: Royal Society of Chemistry journal article supplement (doi:10.1039/c3ta01118f), 2013-01-01
Supplement: c3ta01118f.pdf [file c3ta01118f.pdf]

## A photoluminescent microporous metal organic anionic framework for nitroaromatic explosive sensing

Yun-Shan Xue,<sup>a</sup> Ya-Bing He,<sup>b</sup> Lian Zhou,<sup>a</sup> Fei-Jian Chen,<sup>a</sup> Yan Xu,<sup>c</sup> Hong-Bin Du<sup>a\*</sup> Xiao-Zeng You<sup>a</sup>,  
Bang-Lin Chen<sup>b</sup>

<sup>a</sup> State Key Laboratory of Coordination Chemistry, School of Chemistry and Chemical Engineering, Nanjing University, Nanjing, 210093, China. E-mail: hbdu@nju.edu.cn.

<sup>b</sup> Department of Chemistry, University of Texas at San Antonio, Texas 78249-0698, USA. E-mail: banglin.chen@utsa.edu

<sup>c</sup> Department of Chemistry, Nanjing University of Technology, Nanjing 210009, China.

**Table S1.** Selected bond lengths (Å) and angles (deg) for **1**

|                                         |          |                                       |          |                                       |            |
|-----------------------------------------|----------|---------------------------------------|----------|---------------------------------------|------------|
| In1—O2                                  | 2.112(6) | In2—O3                                | 2.140(7) | In2—O5 <sup>v</sup>                   | 2.434(7)   |
| In1—O7 <sup>ii</sup>                    | 2.175(6) | In2—O6 <sup>v</sup>                   | 2.152(7) |                                       |            |
| In1—O8 <sup>ii</sup>                    | 2.278(5) | In2—O4                                | 2.381(6) |                                       |            |
| O2 <sup>i</sup> —In1—O2                 | 117.2(3) | O3—In2—O3 <sup>iv</sup>               | 80.5(5)  | O3—In2—O5 <sup>v</sup>                | 90.9(3)    |
| O2—In1—O7 <sup>ii</sup>                 | 112.7(3) | O3—In2—O6 <sup>v</sup>                | 138.0(3) | O6 <sup>v</sup> —In2—O5 <sup>v</sup>  | 53.9(2)    |
| O2—In1—O7 <sup>iii</sup>                | 81.5(3)  | O3—In2—O6 <sup>vi</sup>               | 110.0(3) | O6 <sup>vi</sup> —In2—O5 <sup>v</sup> | 138.3(2)   |
| O7 <sup>ii</sup> —In1—O7 <sup>iii</sup> | 153.4(3) | O6 <sup>v</sup> —In2—O6 <sup>vi</sup> | 89.4(4)  | O4—In2—O5 <sup>v</sup>                | 78.4(2)    |
| O2 <sup>i</sup> —In1—O8 <sup>ii</sup>   | 145.1(3) | O3—In2—O4                             | 55.3(3)  | O3—In2—O5 <sup>vi</sup>               | 79.4(2)    |
| O2—In1—O8 <sup>ii</sup>                 | 87.4(2)  | O6 <sup>v</sup> —In2—O4               | 91.8(2)  | O4—In2—O5 <sup>vi</sup>               | 102.22(19) |
| O7 <sup>ii</sup> —In1—O8 <sup>ii</sup>  | 65.5(3)  | O6 <sup>vi</sup> —In2—O4              | 84.6(2)  | O5 <sup>v</sup> —In2—O5 <sup>vi</sup> | 167.3(3)   |
| O2 <sup>i</sup> —In1—O8 <sup>iii</sup>  | 87.4(2)  | O3—In2—O4 <sup>iv</sup>               | 129.5(3) |                                       |            |
| O7 <sup>ii</sup> —In1—O8 <sup>iii</sup> | 94.2(3)  | O4—In2—O4 <sup>iv</sup>               | 174.9(3) |                                       |            |
| O8 <sup>ii</sup> —In1—O8 <sup>iii</sup> | 84.1(3)  |                                       |          |                                       |            |

Symmetry transformations: (i) 1-x, y, 1.5-z; (ii) x, 1+y, z; (iii) 1-x, 1+y, 1.5-z; (iv) x, 2-y, 2-z; (v) 2-x, 1-y, 0.5+z; (vi) 2-x, 1+y, 1.5-z; (vii) 2-x, 1-y, -0.5+z; (viii) x, -1+y, z; (ix) 2-x, y, 1.5-z.

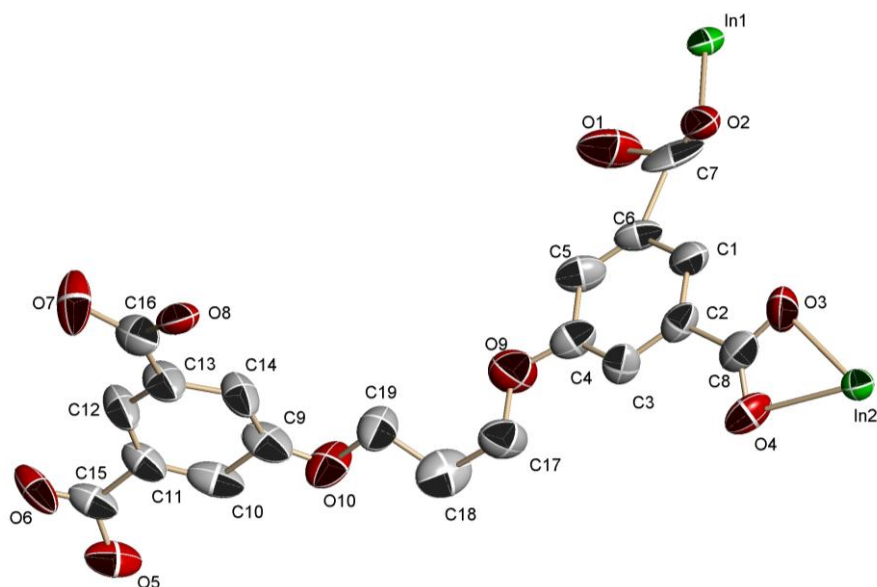

**Fig. S1.** An ORTEP drawing of the asymmetric unit of **1** (with thermal ellipsoids at 30% probability). The H atoms and guest molecules are omitted for clarity.

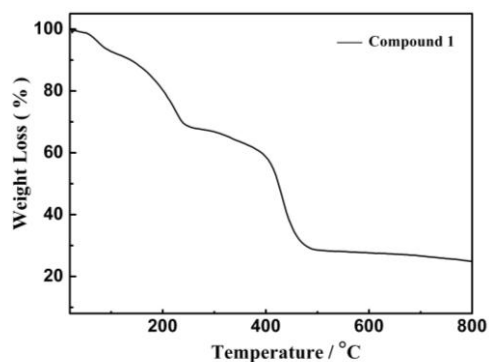

**Fig. S2** TGA curve of compound **1**.

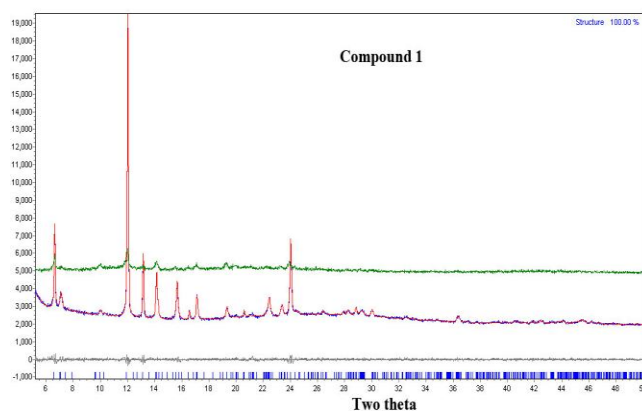

**Fig. S3** PXRD patterns of **1**: The red, blue, and gray lines are the calculated, the as-synthesized and the difference between the calculated and the as-synthesized. The blue bars are the calculated Bragg positions. The best fitting results for **1**:  $a = 12.537(9)$ ,  $b = 13.483(5)$ ,  $c = 25.13(2)$  Å. The green line is that of the activated sample after gas adsorption measurements.

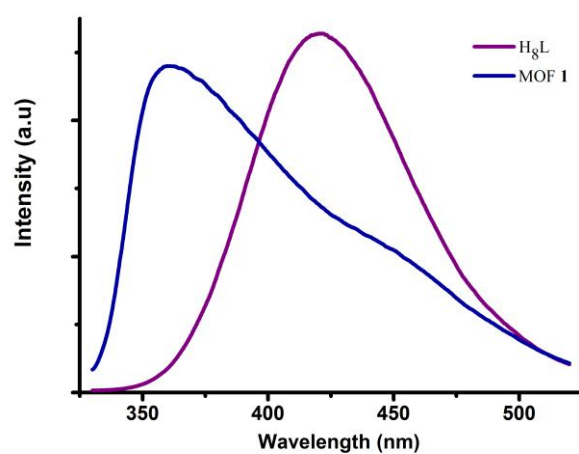

**Fig. S4** Solid-state photoluminescent spectra of **1** and ligand H<sub>8</sub>L at room temperature.
